# Supplementary material for: The origin of specificity and insight into recognition between an aminoacyl carrier protein and its partner ligase
Source: Royal Society of Chemistry journal article supplement (doi:10.1039/c5cp03066h), 2015-01-01
Supplement: c5cp03066h1.pdf [file c5cp03066h1.pdf]

# The origin of specificity and insight into recognition between aminoacyl carrier protein and its protein partner

Aleksandra Maršavelski,<sup>\*a</sup> Marko Močibob,<sup>b</sup> Ita Gruić-Sovulj<sup>b</sup> and Robert Vianello<sup>\*a</sup>

<sup>a</sup> *Quantum Organic Chemistry Group, Ruđer Bošković Institute, Bijenička cesta 54, HR-10000 Zagreb, Croatia. E-mails: [aleksandra.marsavelski@irb.hr](mailto:aleksandra.marsavelski@irb.hr), [robert.vianello@irb.hr](mailto:robert.vianello@irb.hr)*

<sup>b</sup> *Department of Chemistry, Faculty of Science, University of Zagreb, Horvatovac 102a, HR-Zagreb, Croatia*

## Supporting Information

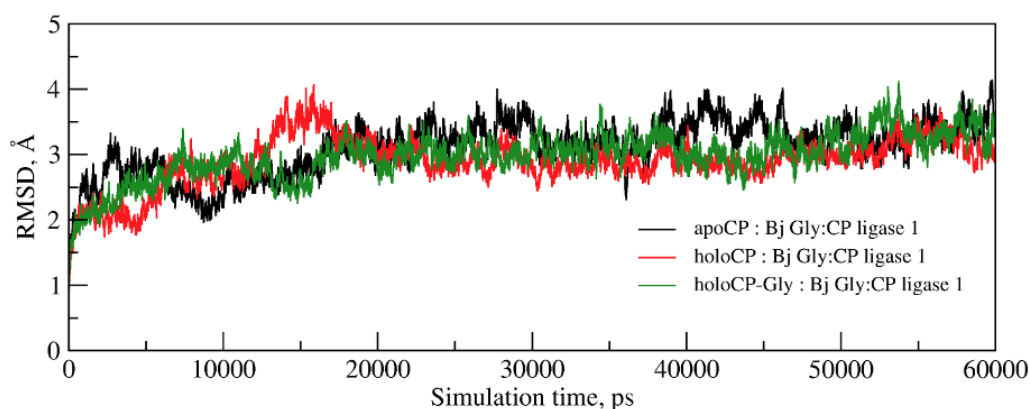

**Figure S1.** The time evolution of RMSD values obtained for the simulated complexes during the 60 ns of MD simulations.

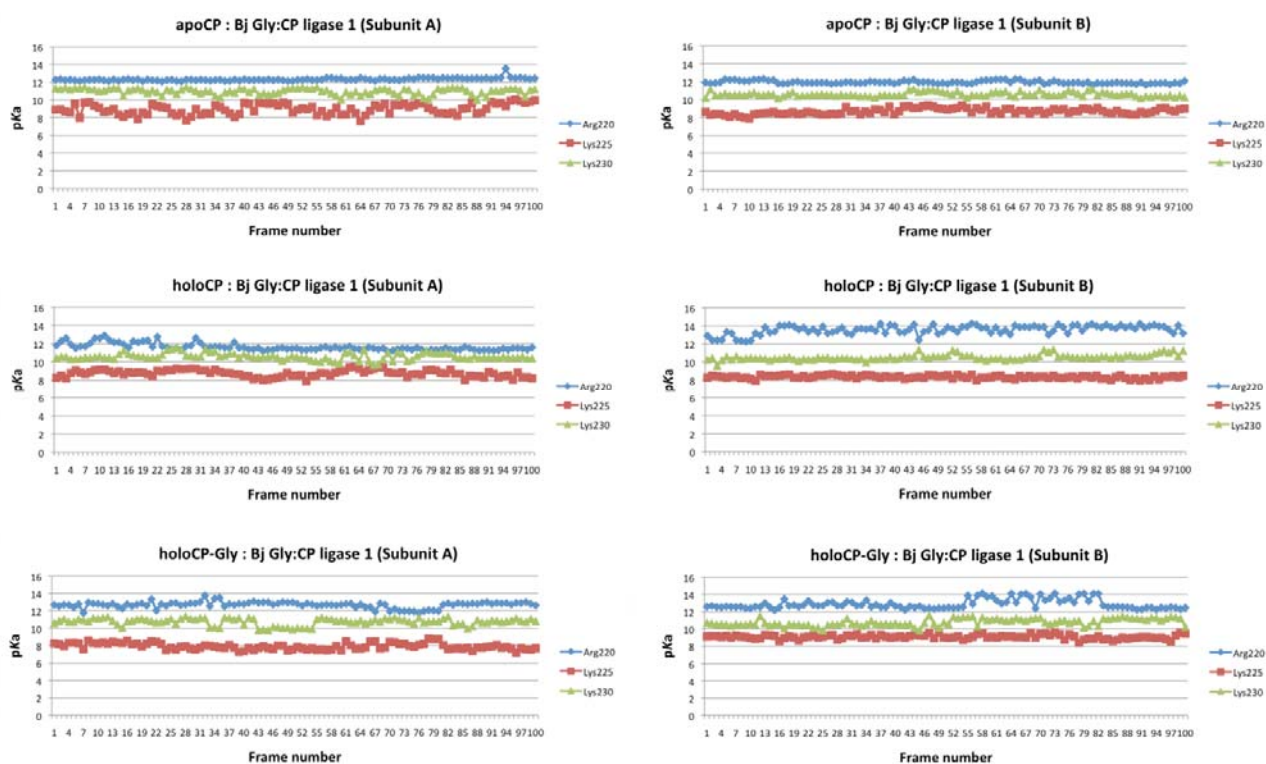

**Figure S2.** PROPKA  $pK_a$  values obtained on snapshot structures sampled at 0.05 ns intervals from the last 5 ns of MD trajectories corresponding to all three complexes.

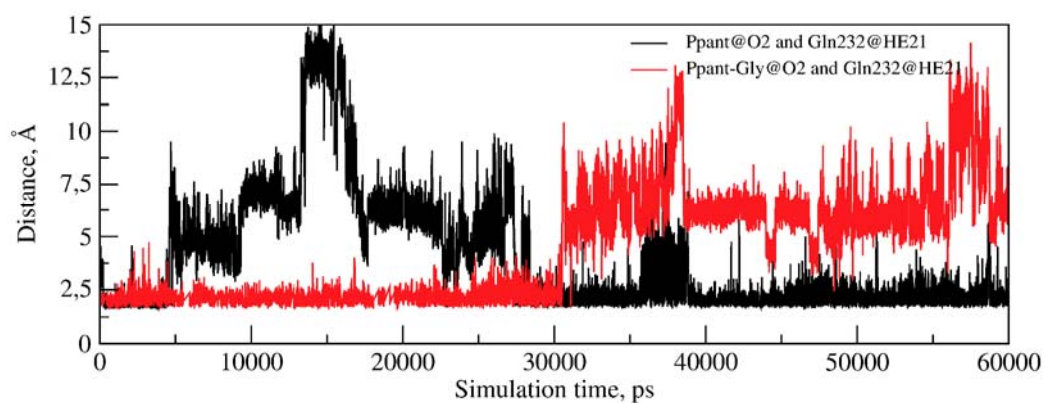

**Figure S3.** Distance between phosphate oxygens of **Ppant** (black) and **Ppant-Gly** (red) and side-chain of Gln232 within the active site of the ligase.

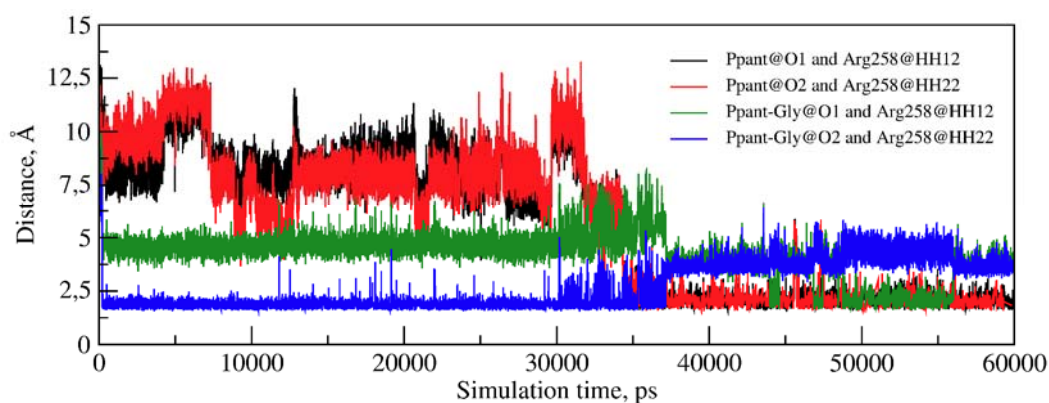

**Figure S4.** Distance between phosphate oxygens of **Ppant** (black and red) and **Ppant-Gly** (green and blue) and side-chain of Arg258 within the active site of the ligase.

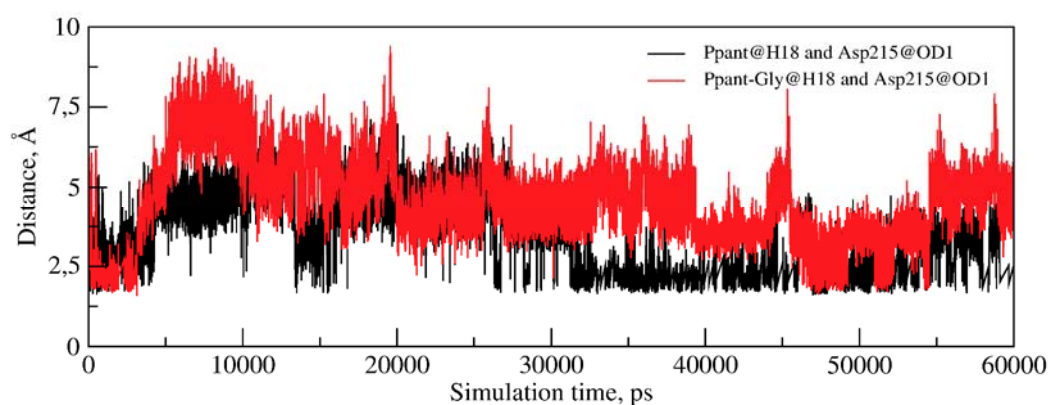

**Figure S5.** Distance between hydrogen (H18) of **Ppant** (black) and **Ppant-Gly** (red) and side-chain of Asp215 within the active site of the ligase.

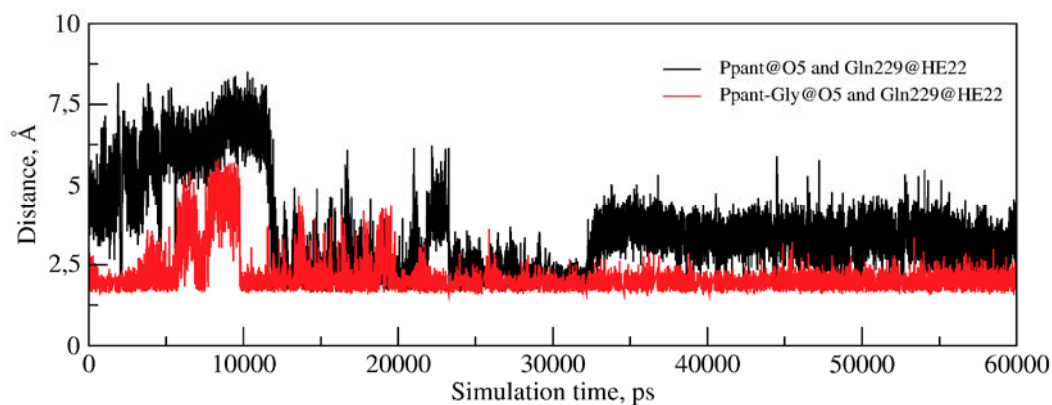

**Figure S6.** Distance between oxygen (O5) of **Ppant** (black) and **Ppant-Gly** (red) and side-chain of Gln229 within the active site of the ligase.

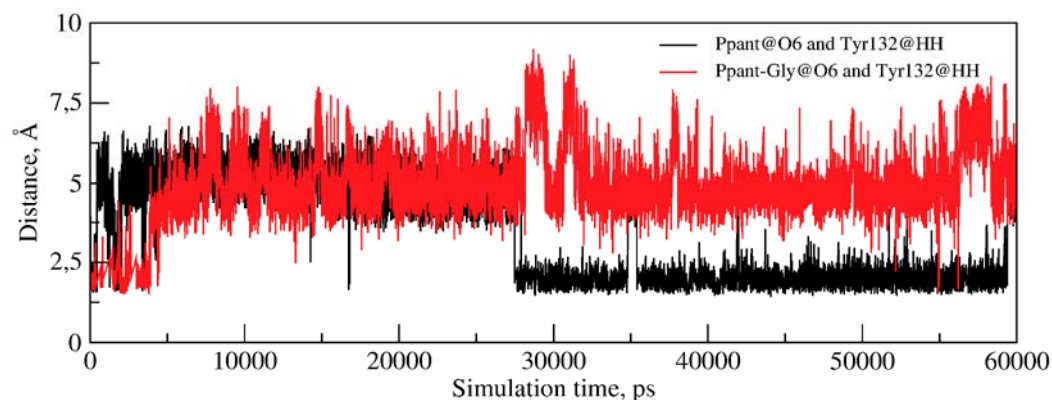

**Figure S7.** Distance between oxygen (O6) of **Ppant** (black) and **Ppant-Gly** (red) and side-chain of Tyr132 within the active site of the ligase.

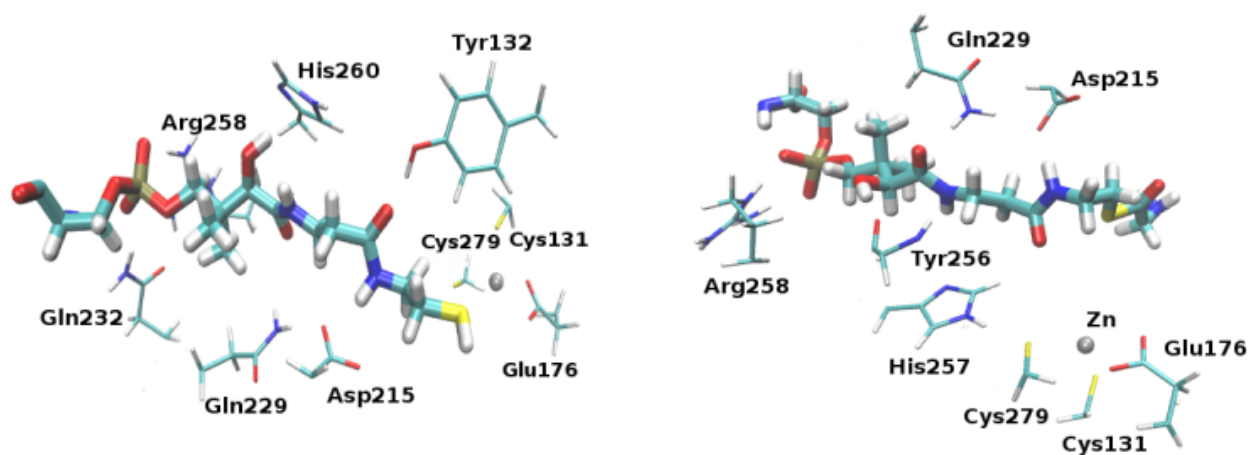

**Figure S8.** Orientation of the model **Ppant** (left) and **Ppant-Gly** (right) prosthetic groups within the ligase active site.

**Table S1.** Alanine scanning results obtained for complexes formed between holoCP and subunit A of Bj Gly:CP ligase 1 and holoCP and subunit B of Bj Gly:CP ligase 1. Binding free energy is a sum of energy components of Van der Waals (VDW), electrostatic interactions (EEL), and polar (EPB) and non-polar (ENPOLAR) terms of solvation free energies. All values are in kcal/mol.<sup>a</sup>

| System (subunit A) | VDW    | EEL    | EGB   | ESURF | $\Delta H_{\text{gas}}$ | $\Delta H_{\text{solv}}$ | $\Delta H_{\text{bind}}$ | $\Delta\Delta H_{\text{bind}}$ |
|--------------------|--------|--------|-------|-------|-------------------------|--------------------------|--------------------------|--------------------------------|
| wild-type complex  | -104.5 | -364.4 | 412.3 | -12.4 | -468.9                  | 399.9                    | <b>-69.0</b>             |                                |
| (R220A) complex    | -100.5 | -163.8 | 220.9 | -11.4 | -264.3                  | 209.5                    | <b>-54.8</b>             | <b>14.2</b>                    |
| (V221A) complex    | -103.0 | -364.6 | 411.5 | -12.3 | -467.6                  | 399.2                    | <b>-68.4</b>             | <b>0.6</b>                     |
| (Q223A) complex    | -101.0 | -370.4 | 416.8 | -12.0 | -471.4                  | 404.7                    | <b>-66.8</b>             | <b>2.2</b>                     |
| (M224A) complex    | -96.7  | -362.5 | 409.4 | -11.7 | -459.2                  | 397.8                    | <b>-61.5</b>             | <b>7.5</b>                     |
| (K225A) complex    | -100.1 | -250.8 | 295.9 | -11.9 | -350.9                  | 283.9                    | <b>-66.9</b>             | <b>2.1</b>                     |
| (V227A) complex    | -102.3 | -363.8 | 410.9 | -12.2 | -466.3                  | 398.6                    | <b>-67.6</b>             | <b>1.4</b>                     |
| (S228A) complex    | -103.4 | -362.9 | 411.9 | -12.3 | -466.3                  | 399.6                    | <b>-66.7</b>             | <b>2.3</b>                     |
| (Q229A) complex    | -102.5 | -365.7 | 414.0 | -12.2 | -468.3                  | 401.7                    | <b>-66.6</b>             | <b>2.4</b>                     |
| (K230A) complex    | -103.7 | -238.7 | 285.0 | -12.4 | -342.4                  | 272.6                    | <b>-69.8</b>             | <b>-0.8</b>                    |
| (Q231A) complex    | -99.6  | -353.9 | 398.8 | -11.8 | -453.5                  | 387.0                    | <b>-66.5</b>             | <b>2.5</b>                     |
| (Q232A) complex    | -99.3  | -361.6 | 407.4 | -11.9 | -460.9                  | 395.4                    | <b>-65.5</b>             | <b>3.5</b>                     |

  

| System (Subunit B) | VDW    | EEL    | EGB   | ESURF | $\Delta H_{\text{gas}}$ | $\Delta H_{\text{solv}}$ | $\Delta H_{\text{bind}}$ | $\Delta\Delta H_{\text{bind}}$ |
|--------------------|--------|--------|-------|-------|-------------------------|--------------------------|--------------------------|--------------------------------|
| wild-type complex  | -107.2 | -378.5 | 420.1 | -12.9 | -485.7                  | 407.2                    | <b>-78.5</b>             |                                |
| (R220A) complex    | -107.4 | -170.3 | 221.8 | -12.4 | -277.7                  | 209.4                    | <b>-68.3</b>             | <b>10.2</b>                    |
| (V221A) complex    | -106.0 | -378.5 | 419.5 | -12.7 | -484.5                  | 406.8                    | <b>-77.7</b>             | <b>0.8</b>                     |
| (Q223A) complex    | -106.1 | -380.4 | 420.9 | -12.7 | -486.5                  | 408.1                    | <b>-78.4</b>             | <b>0.1</b>                     |
| (M224A) complex    | -100.4 | -376.3 | 416.5 | -12.3 | -476.7                  | 404.3                    | <b>-72.4</b>             | <b>6.0</b>                     |
| (K225A) complex    | -104.2 | -274.0 | 313.1 | -12.5 | -378.3                  | 300.6                    | <b>-77.7</b>             | <b>0.8</b>                     |
| (V227A) complex    | -104.1 | -378.0 | 418.1 | -12.5 | -482.1                  | 405.5                    | <b>-76.6</b>             | <b>1.9</b>                     |
| (S228A) complex    | -106.8 | -375.2 | 418.5 | -12.8 | -481.9                  | 405.7                    | <b>-76.3</b>             | <b>2.2</b>                     |
| (Q229A) complex    | -105.8 | -377.5 | 417.5 | -12.5 | -483.3                  | 405.0                    | <b>-78.3</b>             | <b>0.2</b>                     |
| (K230A) complex    | -106.1 | -161.1 | 214.1 | -12.4 | -267.2                  | 201.7                    | <b>-65.5</b>             | <b>12.9</b>                    |
| (Q231A) complex    | -103.6 | -369.9 | 419.2 | -12.8 | -473.6                  | 406.9                    | <b>-66.7</b>             | <b>11.8</b>                    |
| (Q232A) complex    | -100.6 | -367.1 | 407.8 | -12.2 | -467.7                  | 395.6                    | <b>-72.1</b>             | <b>6.4</b>                     |

<sup>a</sup> VDW = van der Waals contribution from MM; EEL = electrostatic energy as calculated by the MM force field; EGB = the electrostatic contribution to the solvation free energy calculated by GB; ESURF = nonpolar contribution to the solvation free energy calculated by an empirical model
